# Supplementary material for: Kinetochore inactivation by expression of a repressive mRNA
Source: eLife journal article supplement (doi:10.7554/elife.27417), 2017-09-14
Supplement: supp [file elife-27417-supp-v1.zip]

Archive with 23 entries (23 files):
- elife_poa_e27417_Figure2_figure_supplement1.pdf
- elife_poa_e27417_Figure7_figure_supplement1.pdf
- elife_poa_e27417_Figure1_figure_supplement1.pdf
- elife_poa_e27417_Figure1_figure_supplement2.pdf
- elife_poa_e27417_Figure6_figure_supplement4.pdf
- elife_poa_e27417_Figure3_figure_supplement1.pdf
- elife_poa_e27417_Figure2_figure_supplement4.pdf
- elife_poa_e27417_Figure5_figure_supplement1.pdf
- elife_poa_e27417_Figure4_figure_supplement3.pdf
- elife_poa_e27417_Figure9_figure_supplement1.pdf
- elife_poa_e27417_Figure2_figure_supplement6.pdf
- elife_poa_e27417_Supplementary_File_1.docx
- elife_poa_e27417_Figure6_figure_supplement3.pdf
- elife_poa_e27417_Figure4_figure_supplement2.pdf
- elife_poa_e27417_Figure9_figure_supplement2.pdf
- elife_poa_e27417_Figure2_figure_supplement2.pdf
- elife_poa_e27417_Figure6_figure_supplement2.pdf
- elife_poa_e27417_Figure2_figure_supplement5.pdf
- elife_poa_e27417_Figure4_figure_supplement1.pdf
- elife_poa_e27417_Figure2_figure_supplement3.pdf
- elife_poa_e27417_Figure8_figure_supplement1.pdf
- elife_poa_e27417_Transparent_Reporting_File.pdf
- elife_poa_e27417_Figure6_figure_supplement1.pdf
