# Supplementary material for: Kinetochore inactivation by expression of a repressive mRNA
Source: eLife journal article supplement (doi:10.7554/elife.27417), 2017-09-14
Supplement: supp [file elife-27417-supp-v1.zip › elife_poa_e27417_Figure9_figure_supplement1.pdf]

Sbay: TTTAGTTTCTGGGAACGTATAGTAGTAGTACTTAAATAGCGCAGAGCAATTTCAATCCAG  
Skud: -TTATTACGTATGAATGCTCAGTAAAGGCACCTT--AAAGAAGACTTCAATGTTAGCAC  
Smik: -TGATTGTGTATGAACATAAAATGTAAGCACCTATATAAAAAGGTGTGATATTAACGCAA  
Spar: -CAATTGTATACGAATATTCAGTATAAACGCCTGTATAGGATGGCGTACTATCAACACAA  
Scer: -CAATTCTATATGGATATGCAGTATAAAAACCTTGTATAAAACAGTGCAGTATCAACACAC  
\* \* \* \* \* \* \* \* \* \* \*

Sbay: GC--TCAACTCTTTACCATATGATGAATTTTCGATTACACAAAATGATCTAGAAGCTATTC  
Skud: AAGCTCACTTCTTATCGGTATAAATATATGCGATACATTA-AATAATGATCTCATTTCTT  
Smik: GCTCACTCCTATACTAGGAATAGGTATATGCATTCTATCG-AATAATGAACATTATTCTC  
Spar: GC---CAATTGTTCTACACATAGGTATATATAATATATCG-AAAAATGCTCATTATTCTC  
Scer: AC---CACTTCTTGTACACATAAATATGTACGCTACATCG-AGAAATGTTTCATTAAATCTC  
\* \* \* \* \* \* \* \* \*

Sbay: GTATTGAAAAAACGGTAAAAAAGAAAAAATCAAAACATACATTACCCGCACAT  
Skud: TTGTTGAAATATGC---GACTGAAAAAATGACCGTCAGAATAACATTTACCCGCACTT  
Smik: TTGTTGGAAGATTT---GGTAATGAAAAATTTTAC--CTACATATCATTTACCCGCAC-A  
Spar: TTTGTTGGAAGTA---TGACAGA---AAAATCTCATCAAAATAACATTTACCCGGATTT  
Scer: TTGTTGGAATAT---GACAAAAGAAAAAATCGTTAAAGTAACATTTACCCGGATA-  
\* \* \* \* \* \* \* \* \*

URS1

Sbay: T-TGGCT-TCTCTTGCCCTTCAAAATAGT**TGGGCGGTT**AGTTTGTTCCTTTCTC-TTAAT  
Skud: T-TCACTGTTTAATATCTTCAAGAAAAGA**TGGGCGGTT**AATTTGTTTCTTTCTTTCTTGT  
Smik: TTAGTTTTCTGTCGAATATTAATAAAAAACAT**TGGGCGGTT**AAGTTATTCTTTTACACTTCTT  
Spar: TCTAATTTAGTCTAATATTTTAAAAAAGA**TGGGCGGTT**AATTTTACTTTTGCTGTTACT  
Scer: --TCTGTTTCAGCCAACATTATAAAAAAGA**TGGGCGGTT**AATTTCCACTCTTACA-GATAT  
\* \* \* \* \* \* \* \* \*

Sbay: CCTTTATTTTGTG-TCATCGACTACAACACG**ATGG**CAAGAAGAACGGAACAGGATAATA  
Skud: TTAATC-TGTTTATTGAACAAACATCAGTAAGGTAGTAAGACTAAGACACAGGA--CAAA  
Smik: ACTCACTTCTTTTCATTCGGCAACATCAAGAAGATATTAAGAAGAGCAATAGCAC---ACT  
Spar: CACTTCTTCT--AATCAACATAAATCAGTAAGATAACAAGAAGAGCAATAACAC---ACT  
Scer: CACTCCTTCT--AATTAACCTACATCAGTAAGAAAGTAAAAAGAGCAACAATTC---GCC  
\* \* \* \* \* \* \* \* \*

Sbay: AGAAGAAGGTAACAAGACAAACAA**ATG**CGGGCTGATTTA**ATG**CCATTTGATTCGCT**ATG**G  
Skud: AGAGGTTTGGTA-----CT**ATG**CGATTAGTACTGGAGTAATTGTGT**ATG**  
Smik: **ATG**ATTTCAGGTT-----CTACTAGTTTATTATCACCAGATTGTTGTTAG  
Spar: CCAACAAAGTTT-----TCGTTGGCTCAATAGTAACAGAGTTTTGCCGG  
Scer: ACAAGAAGGTCT-----CTGTAGGGTCAATAGTAGCAGGGCTCTTGTCAT  
\* \* \* \*

Sbay: TG**ATG**GT---ATTTAAATACAGAAAGGAACACCAGCGGTGCAAATATGTGTCTAGATTTG  
Skud: AGAA-----CAAAAAGACTGAGGGTTTTGAATCAGTTTCGATTTATTGGCGCT  
Smik: AGAGTA**A**---**TG**TTGCGTAAAGCCAAGAAAACCGGAGGTCCGAAAAGTATTGGTGT---T  
Spar: AGAAAGATTGTGGACAAAAAGGAAAGAAAAATTGGAGATCTGAAAATTATTCTTGGTATT  
Scer: GGGAAAGACTGTGA**ATG**CAAAGGAAAGACGGTTGGAGGTCCGAAAAGCATTACTGT**ATG**TT  
\* \* \* \* \* \* \*

Sbay: TCGGTACACGGTGGCTAAGGCCAGTTTTGAC**ATG**AT**ATG**AGTGATC**ATG**GTGGTAATAAA  
Skud: AAAATAGAGCAGAGACT-----TTGTTGTAGTGC**ATG**CTAGAGCCAATAGCTATTGTA  
Smik: AGAATAGGAGAGGAATT-----ATACTACACTACTGGGCACATCTAAAAGCATTTATA  
Spar: AGAATAAAAGAGAAACT-----CA-CTGTACT**ATG**AGCTAGAGTTAGTAGTAACTTTA  
Scer: AGGATTGAAGAGAAATT-----CA-CCGTACT**ATG**TGCCAG**ATG**--GTTATAACTGAA  
\* \* \* \* \* \* \*

Sbay: CATACAGCTAGATCGGGTTGGCTCTG---CTCGGCGGTAAAGGGCTTTCAATGGCACTT  
Skud: TT**ATG**AGCTGAA**ATG**GCTCTATCTGATTCCTAGAAGGTTTCA-TCTAG-TACTGGCAAAT  
Smik: GTTAGGA--TTAATCT**ATG**ACCACATCTCGTTGGGACCCTTG-TTTGGTAACGTTAAATA  
Spar: CATTGGAATAGAGTCGTG**ATG**CATATC--GGTTGGGAGCCAT-GTTAACT**ATG**GTAAGGA  
Scer: CATTGAAATAATATCGTGATT**ATG**GGCTGGTTGAGAGCCCCG-TTAAGTATTGTTAAAGA  
\*

**FIGURE 9-figure supplement 1, Chen and Tresenrider et al.**
