# Supplementary material for: Kinetochore inactivation by expression of a repressive mRNA
Source: eLife journal article supplement (doi:10.7554/elife.27417), 2017-09-14
Supplement: supp [file elife-27417-supp-v1.zip › elife_poa_e27417_Figure9_figure_supplement2.pdf]

Sbay: GCTACCTAATCTTCTGCCCTCGGCGGCTAAACTC-----CGTTACCCAGCTTCA  
Skud: TCTACCCA-CTCTGCTGCCCTCGGCGGCTAATATACTGAGAGAATGGTTACCCATCCCAA  
Smik: TATAGCCAACCTCATTTGCCGTCGGCGGCTAAAAAATACCATAAAGAGGTTACCCATCCTGA  
Spar: TGTAGCCAGTTTACTGCCATTGGCGGTTAAAATATCATTCAGAA-GGTTACCCCTTCTGA  
Scer: TGTAAAGCAGTCTATTGCGATTAGCGGTTAAAATACCATTTCAAG-GGTTACCCATACTGA  
\* \* \* \* \* \* \* \* \*

MSE

Sbay: AA-TACCCAAAAAGACGCTTTCTTGCCTACAAAATGATAAT--ACACAAAACAAAAATTT  
Skud: GA-GATTCAATTTAACGCTTACCACGTACAAAATGATATA--TCCACAAAACGAAAATACC  
Smik: AAAGATTAAAGAGGAAAGTCTACGACGTATAAAGTGATACATCCACAAAACGAATGTTTT  
Spar: AA-GTATAAAAAAATG-GATCATAACGTATAGAATGATATA--CACAAAATTTGAATTTCC  
Scer: AA-GTGCCAAAAGAAAAAAGATAACGTATGGAATGATATA--GTCACAAAACATAATATTTT  
\* \* \* \* \* \* \* \* \*

Sbay: CTAAAATAAACAAACGACACCAAAAATGGCAAAAAACAAAAGAAATAGATAGCATAGA--  
Skud: C-AAAATAAACAAACAACACCAAAAATGGTAAAACAGA--AGAGATAGATAATCTACA--  
Smik: CCAAAGTAAACAAAGAACACCAAAAATAGCGAAAT-AAT-GAAATAGATAACCTGGGAG  
Spar: CCAAATAAACAAACAACACCAAAAATGGCAAGAATTAT-TGGAATAGATTGCGTAG--G  
Scer: CTAAAATAAACAAACAACACCAAAAATGGGTAGAAATAAT-TGGAATACATTACAGG---  
\* \* \* \* \* \* \* \* \*

Sbay: AGAGGTCGGGATCTACCATTGGCTCTTCAGA--GACCGCACTGTCAAAAAATAACCGAAT  
Skud: GGAGGTTAAATCTGCACTAGCTCTTGAGA--ACCCAACTGACTAAAA-AAAAGAAAA  
Smik: GGGGGTAAATCCATCTCTGACGTTTACGAAAGACTAGAACAAACCAACCGTAAAAATAA  
Spar: AGAGGTACAATCCGTCCCTAGCTTCTGTCAAAAACTAAAACAGAGCAAGAAAAAT----A  
Scer: AGAGGTAGAA-----TCGTCCCTGTAAAAAAATTTGAAACGGAACAAGAAAAAT----A  
\* \* \* \* \* \* \* \* \*

Sbay: TCCTTTCCATCCTTTCTCCCCATTTAGAGTGTACTATAGAAATTTTTTATCAGAGAGATA  
Skud: AATCAGCCTCTTCTCCTGCAAGCCTATAGTGTACTATAGAAAGAT-----A  
Smik: AATTTAACCCCTCCTTTTCATATCTAGAGTGTATTATAGAATATCTACATTAGAGAGATA  
Spar: ACTGAACCTTTTTCTCTTCAAATTTAGAGTGTACTATAGTATATTC-TATAGGAGAGATA  
Scer: ACTGACGTTCTTTCTTTTAAACGTTAGGGTGTACTATAATATATTC-CATAAGAGATACC  
\* \* \* \* \* \* \* \* \*

Sbay: CCCGTTTCTGTAAA  
Skud: CCTGTTTCTGTAAG  
Smik: CCCGTTTCTGCAGA  
Spar: CCCGTTTCTATAAA  
Scer: CGTTT--CTATAA-  
\* \* \* \*

**Summary:**

| Species                  | Sbay | Skud | Smik | Spar | Scer |
|--------------------------|------|------|------|------|------|
| Number of putative uORFs | 10   | 8    | 5    | 6    | 9    |

**FIGURE 9-figure supplement 2, Chen and Tresenrider et al.**
