# Supplementary figures and images for: Kinetochore inactivation by expression of a repressive mRNA
Source: eLife journal article supplement (doi:10.7554/elife.27417), 2017-09-14

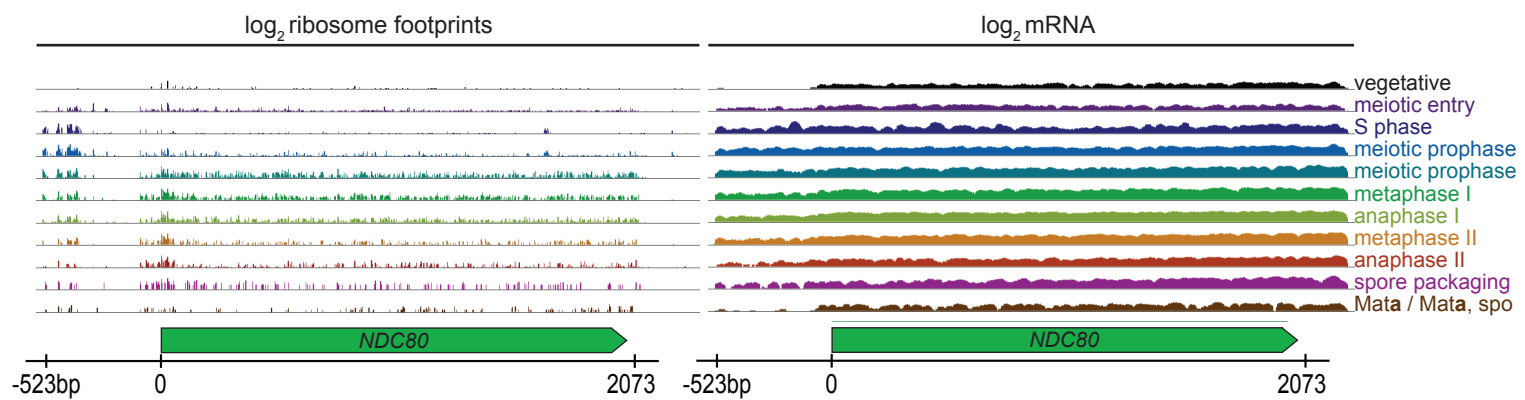

**FIGURE 2-figure supplement 1, Chen and Tresenrider et al.**

Supplement: supp [file elife-27417-supp-v1.zip]

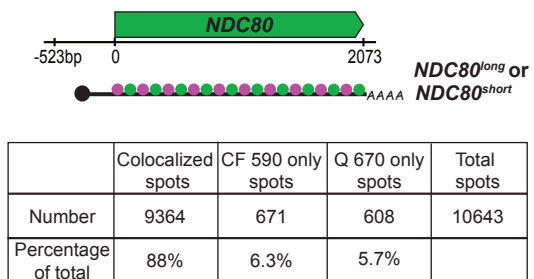

**FIGURE 2-figure supplement 4, Chen and Tresenrider et al.**

Supplement: supp [file elife-27417-supp-v1.zip]

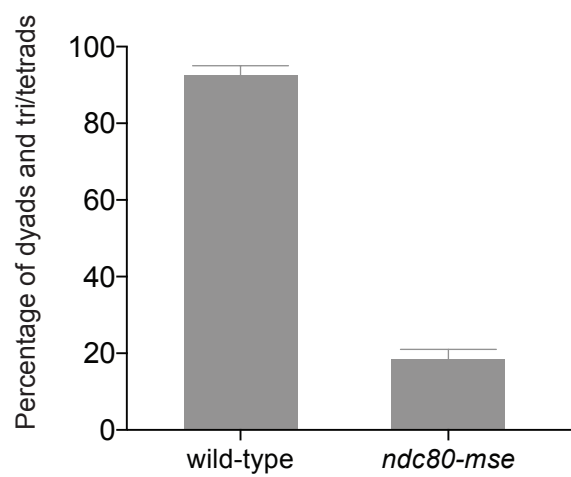

**FIGURE 7-figure supplement 1, Chen and Tresenrider et al.**

Supplement: supp [file elife-27417-supp-v1.zip › elife_poa_e27417_Figure7_figure_supplement1.pdf]

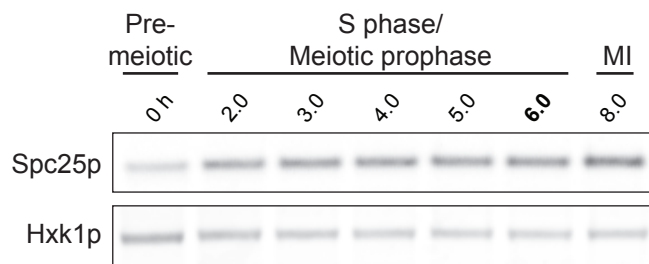

**FIGURE 1-figure supplement 1, Chen and Tresenrider et al.**

Supplement: supp [file elife-27417-supp-v1.zip › elife_poa_e27417_Figure1_figure_supplement1.pdf]

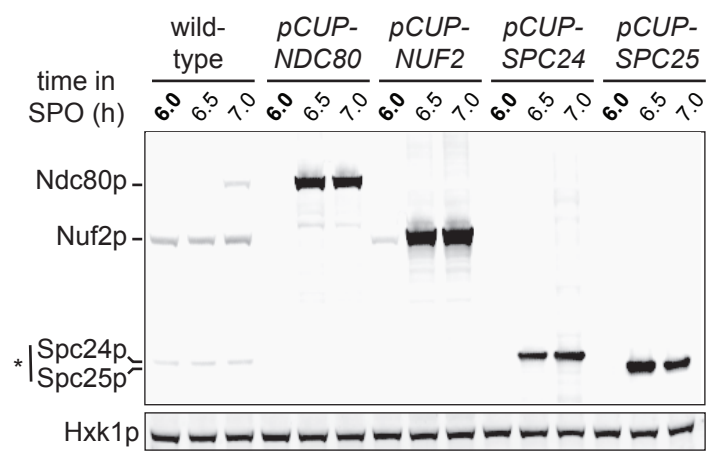

**FIGURE 1-figure supplement 2, Chen and Tresenrider et al.**

Supplement: supp [file elife-27417-supp-v1.zip › elife_poa_e27417_Figure1_figure_supplement2.pdf]

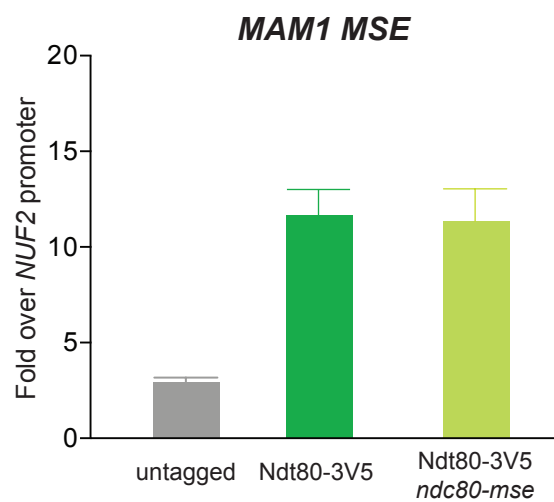

**FIGURE 6-figure supplement 4, Chen and Tresenrider et al.**

Supplement: supp [file elife-27417-supp-v1.zip › elife_poa_e27417_Figure6_figure_supplement4.pdf]

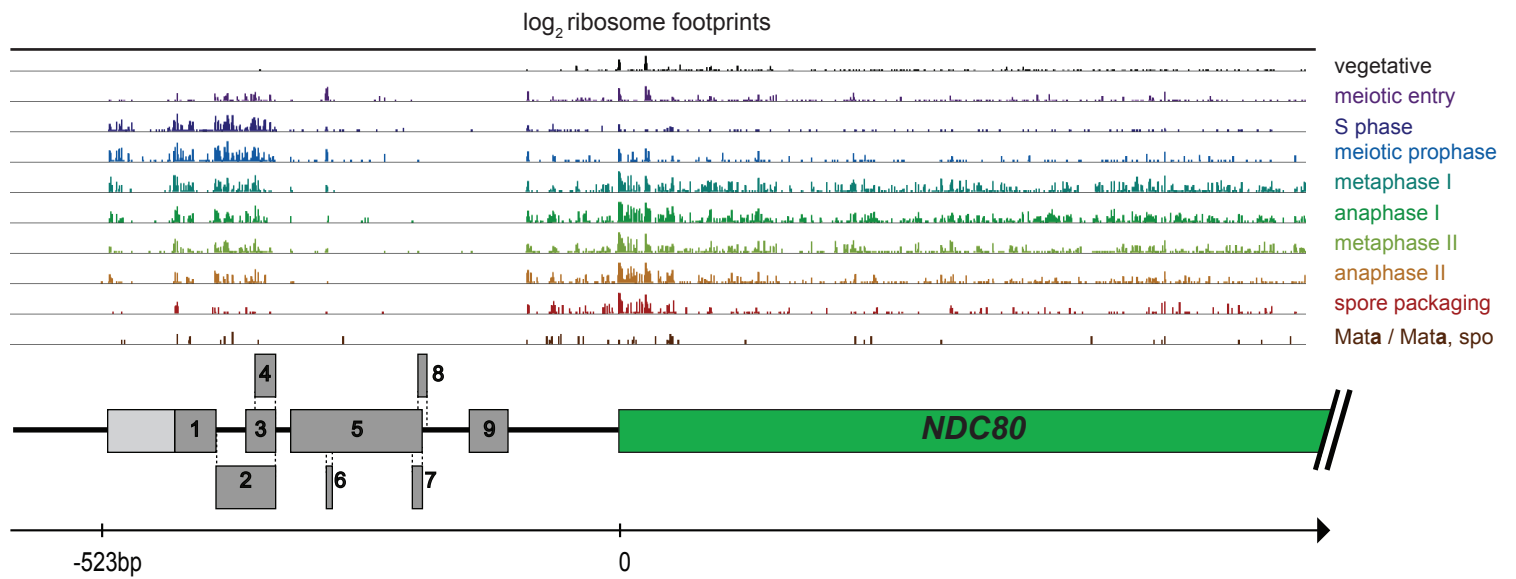

**FIGURE 3-figure supplement 1, Chen and Tresenrider et al.**

Supplement: supp [file elife-27417-supp-v1.zip › elife_poa_e27417_Figure3_figure_supplement1.pdf]

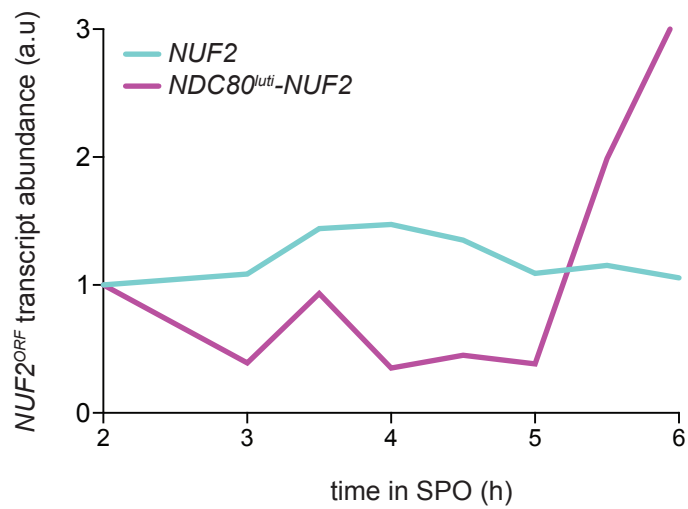

**FIGURE 5-figure supplement 1, Chen and Tresenrider et al.**

Supplement: supp [file elife-27417-supp-v1.zip › elife_poa_e27417_Figure5_figure_supplement1.pdf]

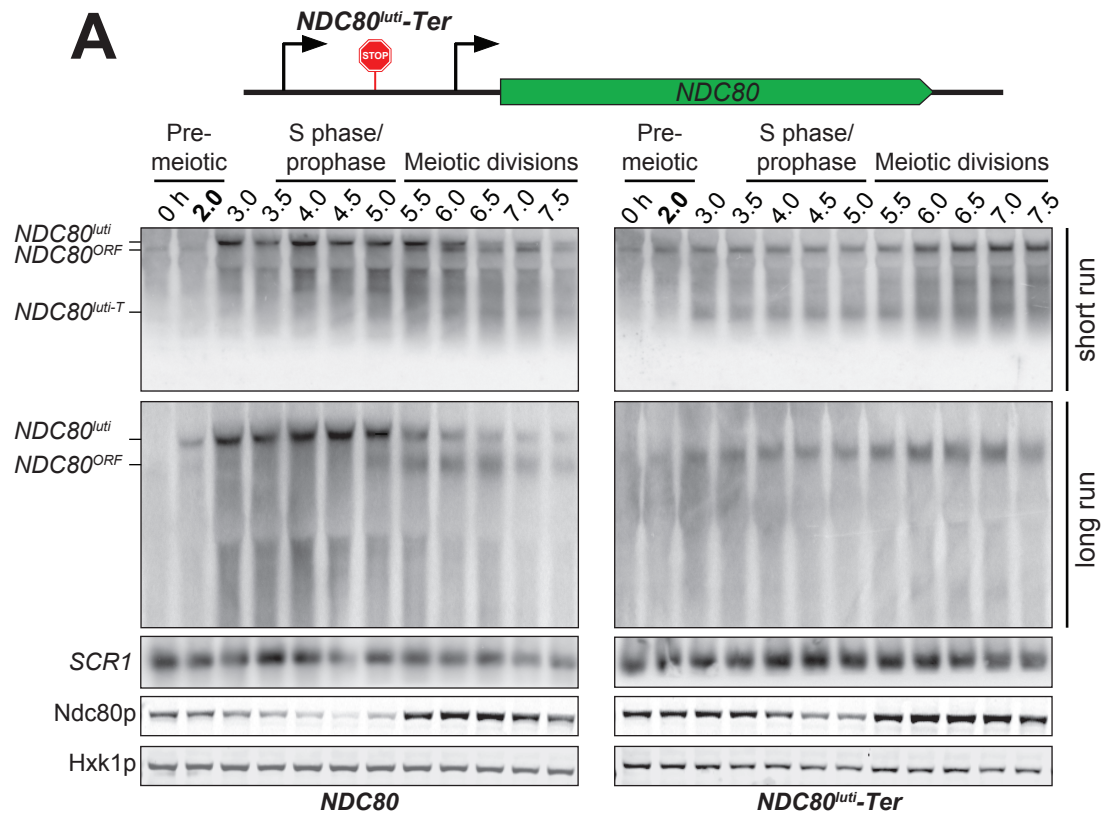

**FIGURE 4-figure supplement 3, Chen and Tresenrider et al.**

Supplement: supp [file elife-27417-supp-v1.zip › elife_poa_e27417_Figure4_figure_supplement3.pdf]

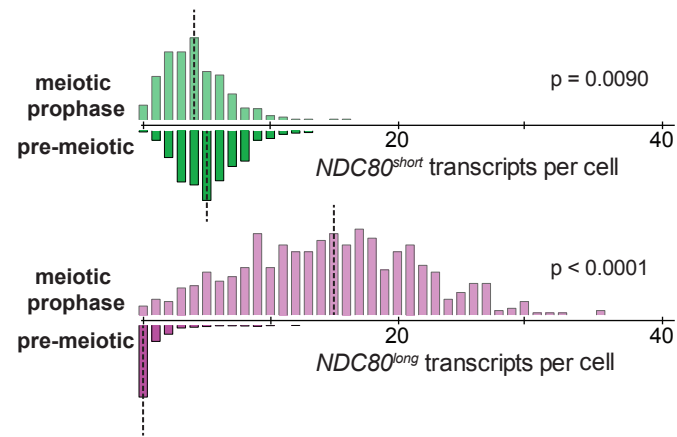

**FIGURE 2-figure supplement 6, Chen and Tresenrider et al.**

Supplement: supp [file elife-27417-supp-v1.zip › elife_poa_e27417_Figure2_figure_supplement6.pdf]

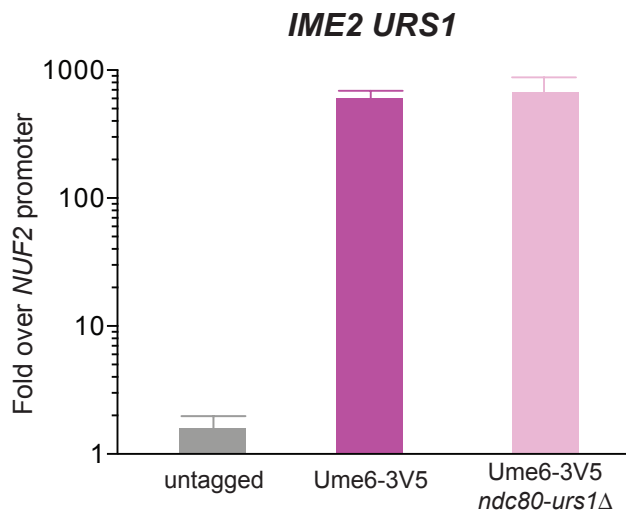

**FIGURE 6-figure supplement 3, Chen and Tresenrider et al.**

Supplement: supp [file elife-27417-supp-v1.zip › elife_poa_e27417_Figure6_figure_supplement3.pdf]

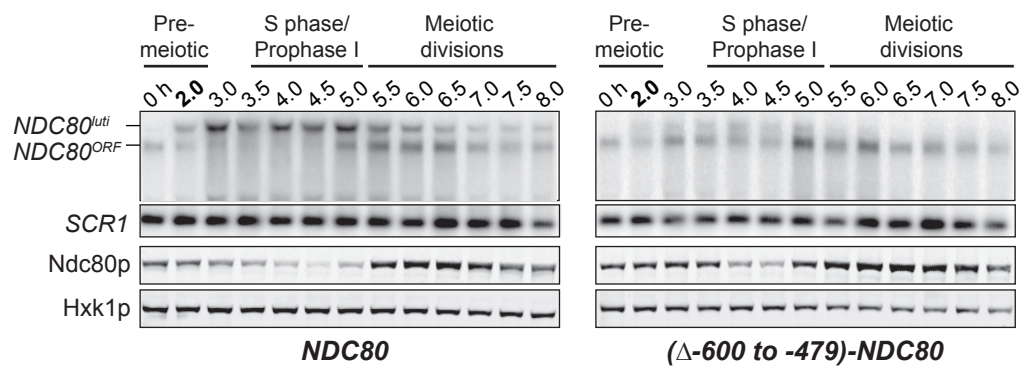

**FIGURE 4-figure supplement 2, Chen and Tresenrider et al.**

Supplement: supp [file elife-27417-supp-v1.zip › elife_poa_e27417_Figure4_figure_supplement2.pdf]

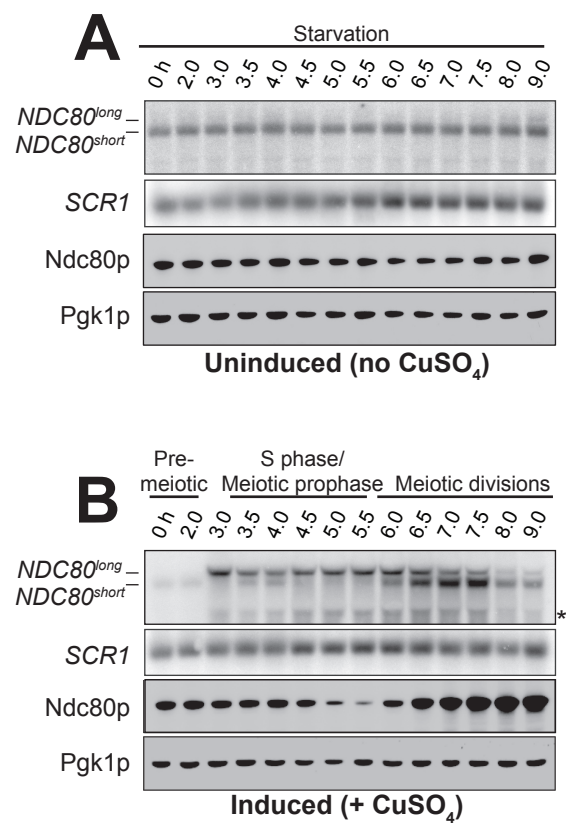

**FIGURE 2-figure supplement 2, Chen and Tresenrider et al.**

Supplement: supp [file elife-27417-supp-v1.zip › elife_poa_e27417_Figure2_figure_supplement2.pdf]

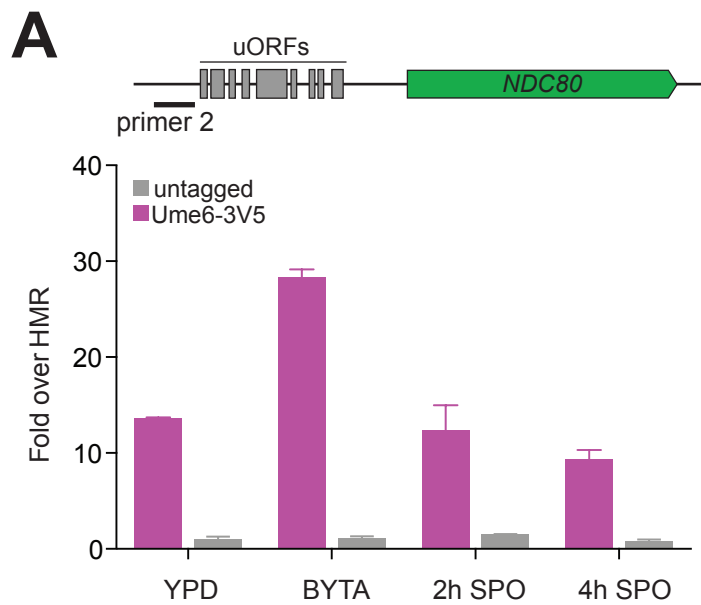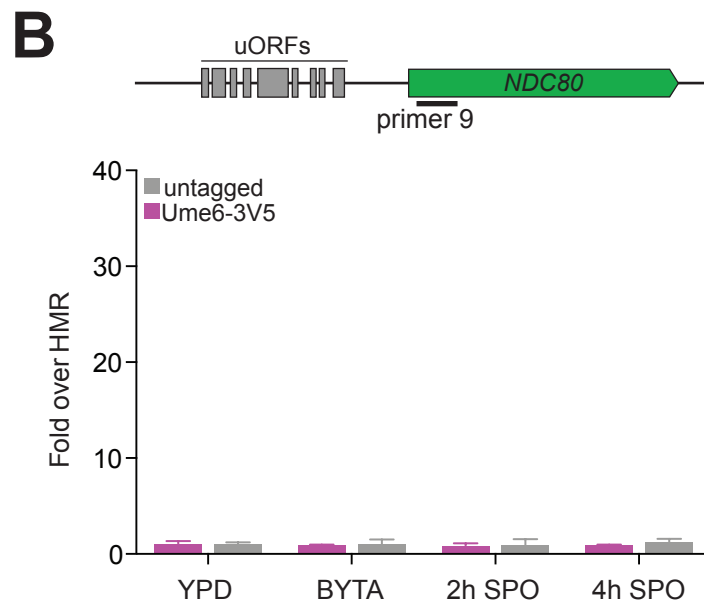

**FIGURE 6-figure supplement 2, Chen and Tresenrider et al.**

Supplement: supp [file elife-27417-supp-v1.zip › elife_poa_e27417_Figure6_figure_supplement2.pdf]

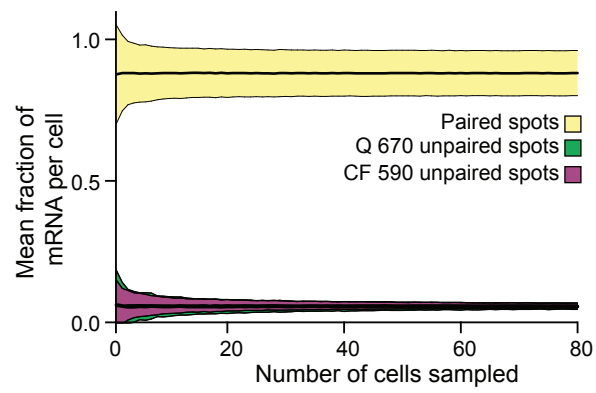

**FIGURE 2-figure supplement 5, Chen and Tresenrider et al.**

Supplement: supp [file elife-27417-supp-v1.zip › elife_poa_e27417_Figure2_figure_supplement5.pdf]

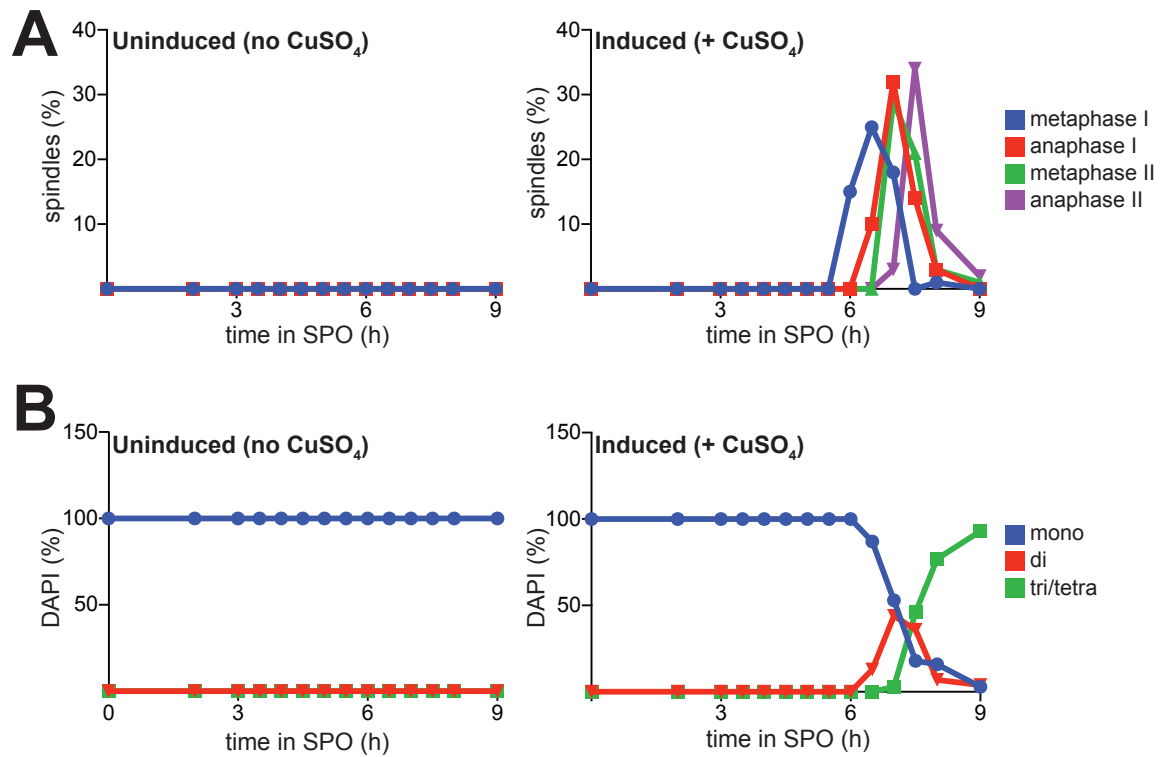

**FIGURE 2-figure supplement 3, Chen and Tresenrider et al.**

Supplement: supp [file elife-27417-supp-v1.zip › elife_poa_e27417_Figure2_figure_supplement3.pdf]

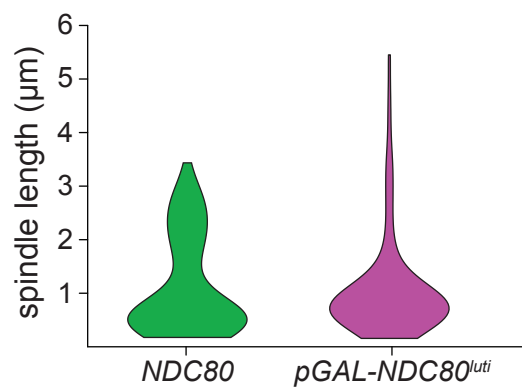

**FIGURE 8-figure supplement 1, Chen and Tresenrider et al.**

Supplement: supp [file elife-27417-supp-v1.zip › elife_poa_e27417_Figure8_figure_supplement1.pdf]

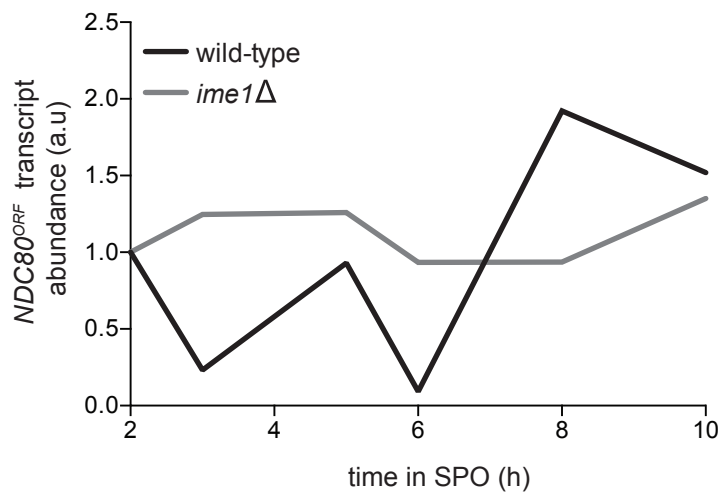

**FIGURE 6-figure supplement 1, Chen and Tresenrider et al.**

Supplement: supp [file elife-27417-supp-v1.zip › elife_poa_e27417_Figure6_figure_supplement1.pdf]
